# Supplementary material for: A robust cocatalyst Pd4S uniformly anchored onto Bi2S3 nanorods for enhanced visible light photocatalysis
Source: Royal Society of Chemistry journal article supplement (doi:10.1039/c4ta05818f), 2015-01-01
Supplement: c4ta05818f1.pdf [file c4ta05818f1.pdf]

*Supplementary Information for*

**A robust cocatalyst Pd<sub>4</sub>S uniformly anchored onto Bi<sub>2</sub>S<sub>3</sub> nanorods for enhanced  
visible light photocatalysis**

Lu-Lu Long,<sup>†a</sup> Ai-Yong Zhang,<sup>†\*ab</sup> Yu-Xi Huang,<sup>a</sup> Xing Zhang,<sup>a</sup> Han-Qing Yu<sup>\*a</sup>

<sup>a</sup>CAS Key Laboratory of Urban Pollutant Conversion, Department of Chemistry,  
University of Science & Technology of China, Hefei, 230026, China

<sup>b</sup>Department of Municipal Engineering, Hefei University of Technology, Hefei,  
230009, China

## 1 Experimental Section

2 **Reagents.** Bismuth nitrate ( $\text{Bi}(\text{NO}_3)_3 \cdot 5\text{H}_2\text{O}$ ), palladium acetylacetonate ( $\text{Pd}(\text{acac})_2$ ),  
3 oleylamine, oleic acid were purchased from Aladdin (Aladdin Reagent Inc., China).  
4 Thioacetamide ( $\text{C}_2\text{H}_5\text{NS}$ ), diphenyl oxide were purchased from Sinopharm Chemical  
5 Reagent (Sinopharm Co., China). All the chemicals were used as purchased without  
6 further purification, and deionized water (DI water) was used throughout the study.  
7 The polycrystalline  $\text{TiO}_2$  P25 (Degussa Co, Germany) possesses a mean particle size  
8 of about 25 nm, anatase/rutile = 80:20 and a BET surface area of ca. 50  $\text{m}^2/\text{g}$ .

9 **Preparation of  $\text{Bi}_2\text{S}_3$  Nanorods.**  $\text{Bi}_2\text{S}_3$  nanorods were synthesized through a simple  
10 hydrothermal procedure. In a typical reaction, 120 mg of  $\text{Bi}(\text{NO}_3)_3 \cdot 5\text{H}_2\text{O}$  and 60 mg  
11 of  $\text{C}_2\text{H}_5\text{NS}$  were mixed with 20 mL of DI water. The mixed solution was treated by  
12 sonication for 5 min and then transferred into a Teflon-lined stainless steel autoclave,  
13 heated at 200 °C for 24 h, and then air-cooled to room temperature. The obtained  
14 black powders were centrifugated and washed thoroughly with DI water and dried at  
15 50 °C for 12 h.

16 **Preparation of  $\text{Pd}_4\text{S}/\text{Bi}_2\text{S}_3$  Hybrid.** The hybrid was synthesized using a facial  
17 method, in which  $\text{Pd}_4\text{S}$  nanoparticles were in-situ formed from  $\text{Bi}_2\text{S}_3$  nanorods  
18 through a thermal reduction and subsequent cation-exchange. Briefly, 100 mg of the  
19 as-prepared  $\text{Bi}_2\text{S}_3$  nanorods were dispersed in a solution containing 2 mL of  
20 oleylamine, 0.5 mL of oleic acid and 17 ml of diphenyl ether at 50 °C, and then 100  
21 mg of  $\text{Pd}(\text{acac})_2$  was added. The mixture was stirred under nitrogen flush for 0.5 h,  
22 then heated to 200 °C and kept for 10 min. Afterwards, the flask was removed from  
23 heat and allowed to cool. The product was centrifuged by adding acetone. The  
24 obtained black powders were washed twice by precipitation and centrifugation in  
25 cyclohexane and ethanol. For comparison, the  $\text{PdS}/\text{Bi}_2\text{S}_3$  hybrid was also prepared by  
26 prolonging the reaction time to 1 h at 200 °C, other conditions remained unchanged as  
27 for the  $\text{Pd}_4\text{S}/\text{Bi}_2\text{S}_3$  hybrid.

28 **Characterization.** The  $\text{Bi}_2\text{S}_3$  and  $\text{Pd}_4\text{S}/\text{Bi}_2\text{S}_3$  catalysts were examined by X-ray  
29 diffraction (XRD) (Rigaku TTR-III, PHILIPS Co., the Netherlands) with  $\text{Cu K}\alpha$   
30 radiation. X-ray photoelectron spectra (XPS) were recorded on an ESCALAB 250  
31 instrument (VG Instrument Ltd., USA) with a monochromatic  $\text{Mg K}\alpha$  X-ray source to  
32 determine the chemical compositions and valence band. Transmission electron  
33 microscope (TEM) images were taken using a high-resolution TEM (JEM-2011,  
34 JEOL Co., Japan) with an acceleration voltage of 200 kV. High-resolution  
35 transmission electron microscope (HRTEM) images, selected-area electron diffraction  
36 (SAED), elemental mapping and energy-dispersive X-ray spectroscopy (EDS) were  
37 conducted on a JEM-ARM200F (JEOL Co., Japan). The diffuse reflectance spectra  
38 (DRS) were measured using a UV-Vis spectrophotometer (UV 2550, Shimadzu Co.,  
39 Japan). The IR spectra were obtained using an infrared spectrometer (Vertex 70,  
40 Bruker Co., Germany). The ESR signal of the radicals spin-trapped by 5,5-dimethyl-

41 lpyrroline-N-oxide (DMPO) was recorded on a Bruker EPR A300 spectrometer. The  
42 irradiation source ( $\lambda > 420$  nm) was a 300 W Xe arc lamp system, and the settings for  
43 the ESR spectrometer were as follows: center field = 3512 G, microwave frequency =  
44 9.86 GHz, and power = 6.36 mW. Photoluminescence spectrum (PL) measurements  
45 were carried out by a fluorescence spectrophotometer (F-4600, Hitachi Co., Japan),  
46 containing a xenon lamp with 360 nm excitation wavelength at room temperature.

47 Electrochemical impedance spectroscopy (EIS) measurements were performed in  
48 0.2 M Na<sub>2</sub>S solution at open circuit potential over a frequency range from 105 to 10<sup>-1</sup>  
49 Hz. Photocurrent data were obtained in 0.1 M Na<sub>2</sub>SO<sub>4</sub> solution at 0.25 V (vs. KCl-  
50 saturated Ag/AgCl electrode). Mott-Schottky spectra measurement was performed in  
51 0.3 M Na<sub>2</sub>SO<sub>4</sub> solution at pH = 7.0. All the electrochemical tests were performed on a  
52 work station (CHI 660C, CH Instrument Co., China).

53 **Photocatalytic Degradation of Atrazine.** The photocatalytic activity of the as-  
54 prepared Pd<sub>4</sub>S/Bi<sub>2</sub>S<sub>3</sub> hybrid was evaluated by degrading atrazine (ATRZ, 10 mg L<sup>-1</sup>)  
55 under visible light irradiation. Typically, 3 mg of Pd<sub>4</sub>S/Bi<sub>2</sub>S<sub>3</sub> was dispersed in 30 mL  
56 mixed aqueous suspension containing 0.15 M of Na<sub>2</sub>SO<sub>3</sub> and 0.1 M of Na<sub>2</sub>S as  
57 sacrificial reagents. Prior to irradiation, the suspension was sonicated for 5 min and  
58 then magnetically stirred for 10 min to establish adsorption-desorption equilibrium. A  
59 500 W Xenon lamp (wavelength  $> 420$  nm by pass filter) was used as the visible light  
60 source. At given time intervals, an aliquot of the mixed solution was collected and  
61 centrifuged, and the residual ATRZ concentration in the supernatant was analyzed  
62 using high performance liquid chromatography (HPLC, 1100, Agilent Inc., USA)  
63 with a variable-wavelength detector (VWD) set at 220 nm. The mobile phase was  
64 consisted of H<sub>2</sub>O and methanol (50:50), and the flow rate was 0.8 mL/min. The main  
65 degradation products of Atrazine on Pd<sub>4</sub>S/Bi<sub>2</sub>S<sub>3</sub> were identified by liquid  
66 chromatography-mass spectrometry (LC-MS, 6460, Agilent Inc., USA).

## 67 Results and Discussion

68

69 **Formation of the Bi<sub>2</sub>S<sub>3</sub> Nanorods.** Fig. S1 shows the SEM images of the Bi<sub>2</sub>S<sub>3</sub>  
70 nanostructures at different reaction times: at 1 h, the obtained sample was dominantly  
71 composed of thin and short nanorods with a diameter of 100 nm and length of 500 nm  
72 (Fig. S1a); at 2 h, the thin and short nanorods started to connect with each other (Fig.  
73 S1b); at 3 h, the samples were obviously composed of the cross-connected rods  
74 combining side-by-side (Fig. S1c); at 4 h, the small size nanorods further became  
75 bigger, with ca. 1 μm in length and ca. 100-200 nm in width (Fig. S1d); at 5 h, the  
76 bigger rods started to combine side by side again and turned into a big-size rod, which  
77 was more than 1 μm length and 200 nm width (Fig. S1e). After the reaction time was  
78 increased up to 24 h, the 1D nanorods of several micrometers length were finally  
79 formed with the prolonged reaction time (Fig. S1f-h).

80 With the above observations, the attachment-recrystallization growth mechanism  
81 for the formation of Bi<sub>2</sub>S<sub>3</sub> nanorods is proposed. The growth process of Bi<sub>2</sub>S<sub>3</sub>  
82 nanorods indicates that their growth involved four main processes (Scheme S1): (1)  
83 the formation of thin and short nanorods from primary nanoparticles, which was a  
84 crucial step in the successful formation of the final nanorods; (2) the thin and short  
85 nanorods served as building blocks attached together side-by-side, because small  
86 nanocrystals had high surface energy and prone to congregate with each other; (3) the  
87 side-by-side attached nanorods grow into long and wide nanorods *via* Ostwald  
88 ripening process; and (4) repeating the processes of (2) and (3) to further reduce the  
89 surface energy by recrystallization.

**Table S1** Chemical composition of the as-prepared Pd<sub>4</sub>S/Bi<sub>2</sub>S<sub>3</sub> hybrid (PdBi-1)

| Element | Weight % | Atom % |
|---------|----------|--------|
| S K     | 20.40    | 60.06  |
| Pd L    | 9.14     | 8.11   |
| Bi M    | 70.47    | 31.83  |
| Total   | 100.01   | 100.00 |

**Table S2** The reaction rate constants on the different catalysts

| Sample                         | Pseudo-first-order rate constant<br>( $\times 10^{-3} \text{ min}^{-1}$ ) | Regression square<br>( $R^2$ ) |
|--------------------------------|---------------------------------------------------------------------------|--------------------------------|
| Bi <sub>2</sub> S <sub>3</sub> | 4.56                                                                      | 0.9892                         |
| PdBi-1                         | 11.21                                                                     | 0.9307                         |
| PdBi-3                         | 6.1                                                                       | 0.9993                         |
| PdBi-2                         | 4.78                                                                      | 0.9115                         |
| BiPd sp                        | 2.94                                                                      | 0.9704                         |
| P25                            | 1.88                                                                      | 0.9968                         |
| Photo                          | 1.08                                                                      | 0.9791                         |

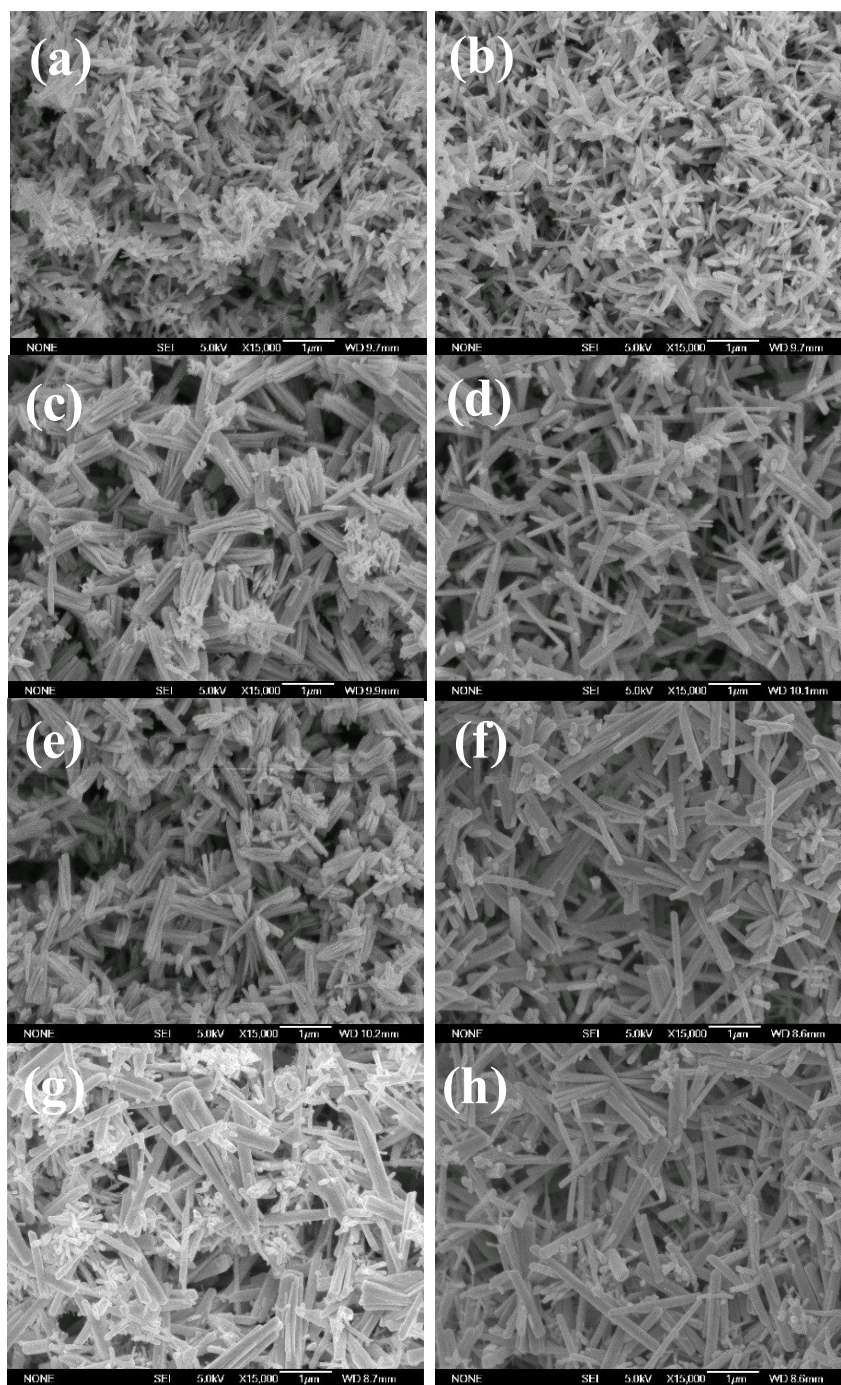

**Fig. S1** SEM images of the  $\text{Bi}_2\text{S}_3$  nanostructures at different reaction times: (a) 1 h, (b) 2 h, (c) 3 h, (d) 4 h, (e) 5 h, (f) 10 h, (g) 16 h, and (h) 24 h.

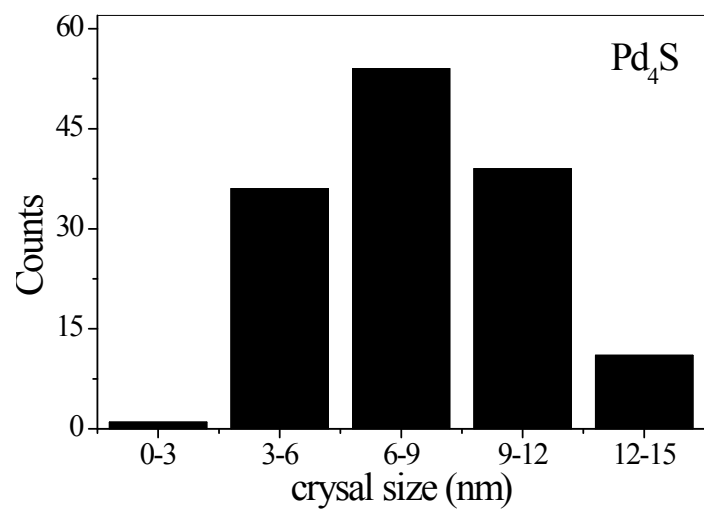

**Fig. S2** Particle size distribution of  $\text{Bi}_2\text{S}_3$  in the  $\text{Pd}_4\text{S}/\text{Bi}_2\text{S}_3$  hybrid (PdBi-1).



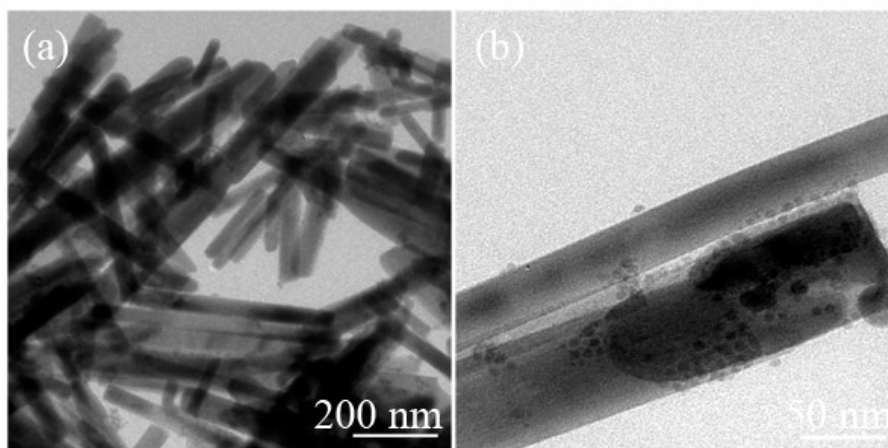

**Fig. S3** (a) Low- and (b) high-magnified TEM images of the Pd<sub>4</sub>S/Bi<sub>2</sub>S<sub>3</sub> hybrid (PdBi-2, starting ratio).

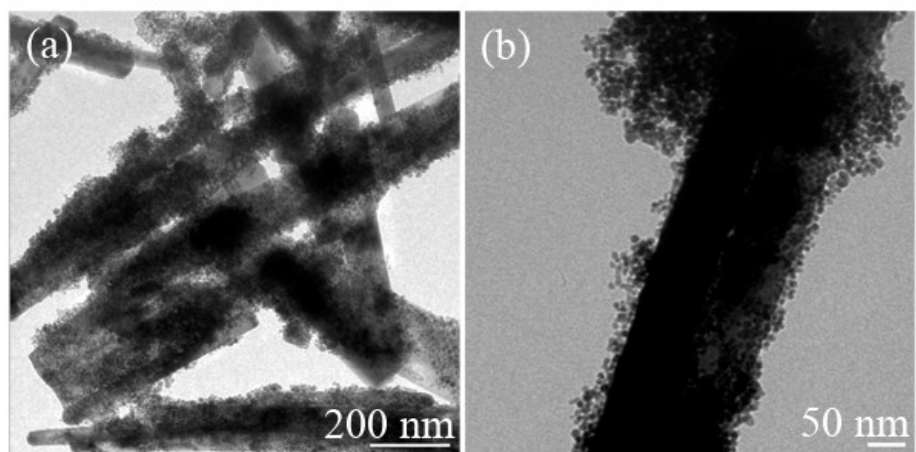

**Fig. S4** (a) Low- and (b) high-magnified TEM images of the Pd<sub>4</sub>S/Bi<sub>2</sub>S<sub>3</sub> hybrid (PdBi-3, starting ratio).

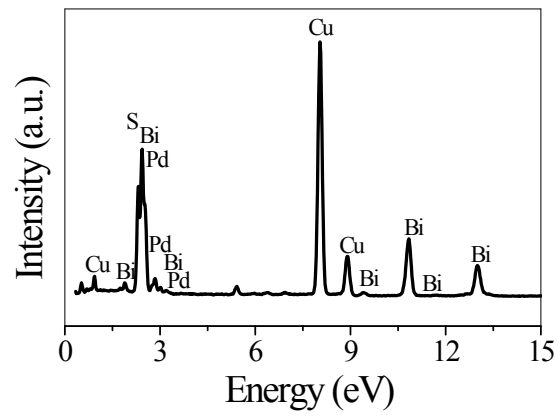

**Fig. S5** EDS spectrum of the Pd<sub>4</sub>S/Bi<sub>2</sub>S<sub>3</sub> hybrid (PdBi-1, starting ratio).

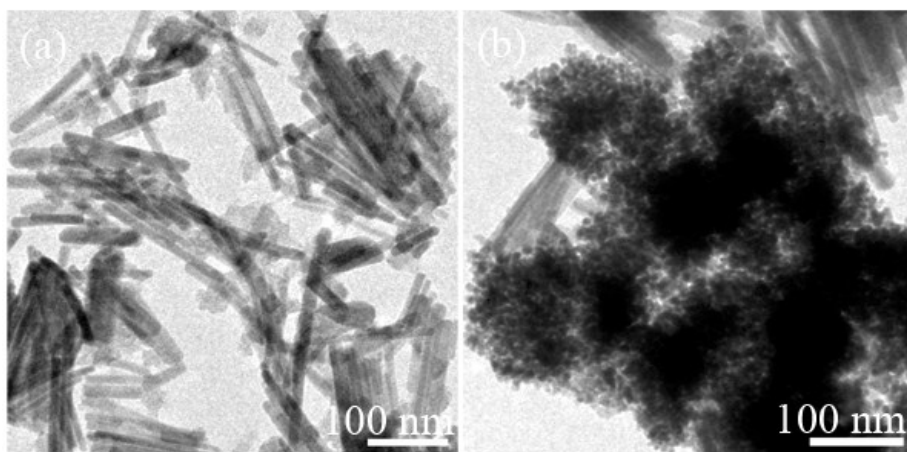

**Fig. S6** TEM images of (a) the Bi<sub>2</sub>S<sub>3</sub> nanorods and (b) the Pd<sub>4</sub>S/Bi<sub>2</sub>S<sub>3</sub> hybrids (reaction for 10 min).

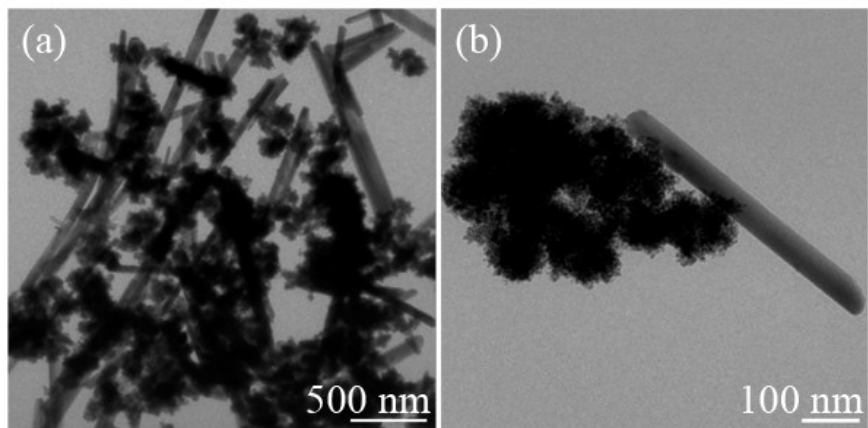

**Fig. S7** TEM images of the Pd<sub>4</sub>S nanoparticles separated from the Bi<sub>2</sub>S<sub>3</sub> nanorods (PdBi sp).

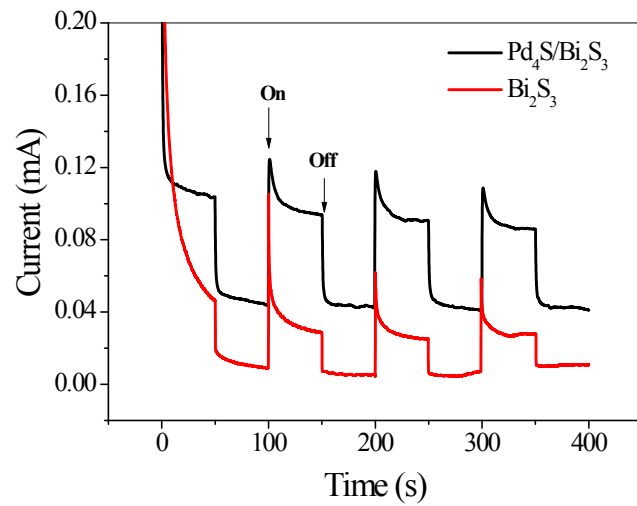

**Fig. S8** Current-time curves of the  $\text{Bi}_2\text{S}_3$  nanorods and  $\text{Pd}_4\text{S}/\text{Bi}_2\text{S}_3$  hybrid (PdBi-1) at a bias of 0.25 V under chopped visible light illumination ( $\lambda > 420$  nm).

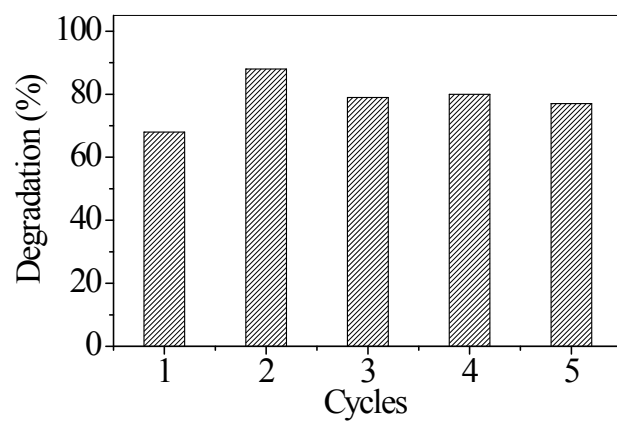

**Fig. S9** Cycling degradation of Atrazine on the Pd<sub>4</sub>S/Bi<sub>2</sub>S<sub>3</sub> hybrid (PdBi-1).

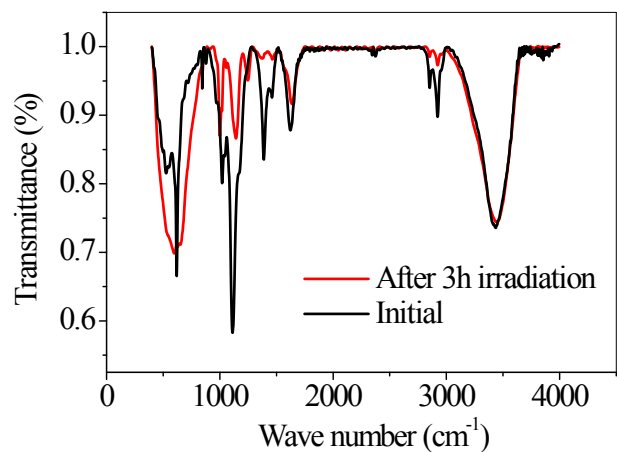

**Fig. S10** FTIR spectra of the as-prepared Pd<sub>4</sub>S/Bi<sub>2</sub>S<sub>3</sub> hybrid: initial (black) and after 3-h irradiation (red). After 3-h irradiation, the absorption peaks of some functional groups, such as -CH<sub>2</sub>-CH<sub>2</sub>- (1381 cm<sup>-1</sup>, 1470 cm<sup>-1</sup>, 2931 cm<sup>-1</sup>), C=C (1650 cm<sup>-1</sup>) and -C-O-C- (1137 cm<sup>-1</sup>), decreased.



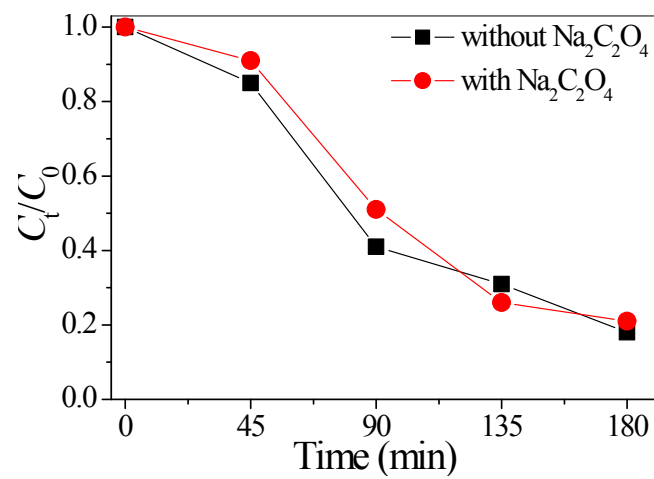

**Fig. S11** Hole-capturing testing results of the  $\text{Pd}_4\text{S}/\text{Bi}_2\text{S}_3$  hybrid for the photocatalytic degradation of Atrazine under visible light irradiation.

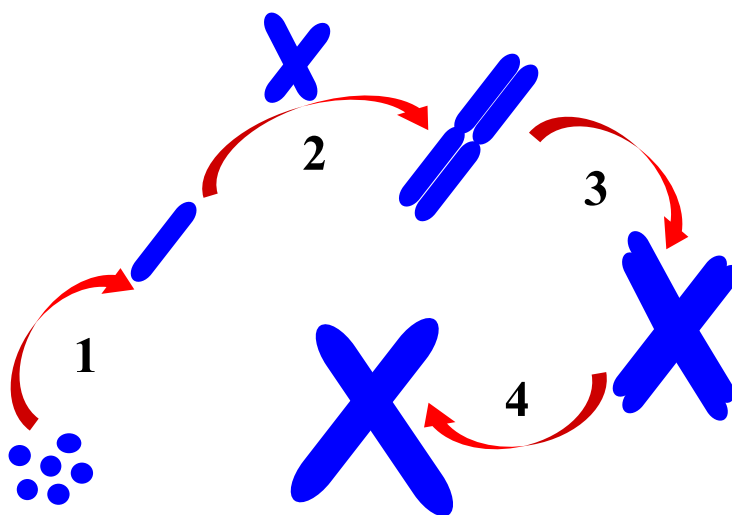

**Scheme S1** The proposed  $\text{Bi}_2\text{S}_3$  nanorods formation mechanism.

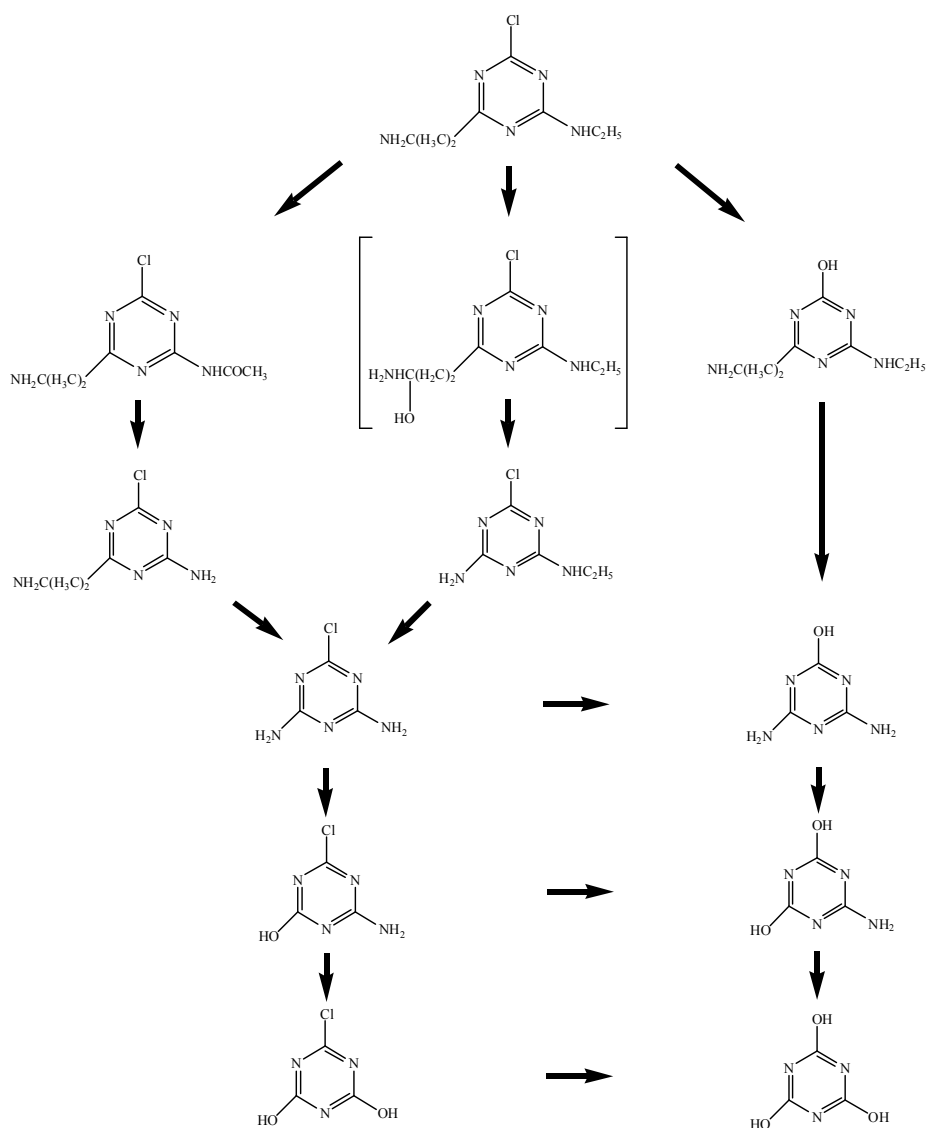

**Scheme S2** The proposed photocatalytic Atrazine degradation pathway on the  $\text{Pd}_4\text{S}/\text{Bi}_2\text{S}_3$  hybrid.
